# Supplementary material
Source: Springer Nature journal article supplement (https://www.springermedizin.de/resource/supplementary/12885_2012_3911_MOESM7_ESM.pdf/9464730)

**A**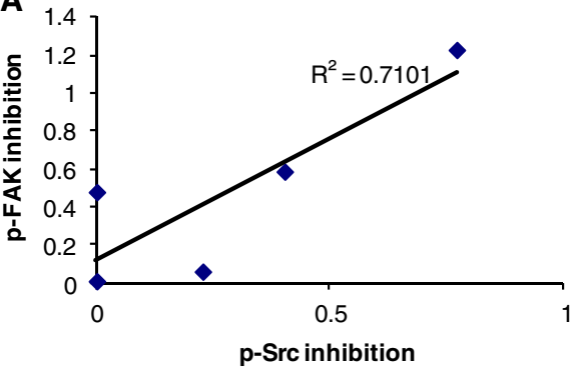**B**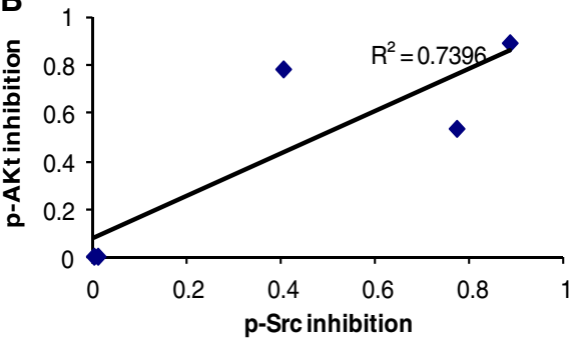

Supplement: MOESM7 [file 9464730]
